# Supplementary material
Source: publisher site journal article supplement (https://www.spandidos-publications.com/8707/downloadSupplementary)
Supplement: Supplementary file 1 [file downloadSupplementary]

Table SI. All antibody information.

| Name                 | Cat. no.   | Dilution                       | Manufacturer                   | Type of experiment |
|----------------------|------------|--------------------------------|--------------------------------|--------------------|
| Primary antibodies   |            |                                |                                |                    |
| TBX15                | 25148-1-AP | 1:4,000                        | Proteintech Group, Inc.        | Western blotting   |
| MMP14                | 29111-1-AP | 1:600                          | Proteintech Group, Inc.        | Western blotting   |
| Granzyme B           | 13588-1-AP | 1:1,000                        | Proteintech Group, Inc.        | Western blotting   |
| Perforin             | 14580-1-AP | 1:10,000                       | Proteintech Group, Inc.        | Western blotting   |
| CD100                | 27516-1-AP | 1:500                          | Proteintech Group, Inc.        | Western blotting   |
| IFN- $\gamma$        | AWA42324   | 1:1,000                        | Abiowell, China                | Western blotting   |
| TNF- $\alpha$        | 17590-1-AP | 1:1,000                        | Proteintech Group, Inc.        | Western blotting   |
| METTL3               | 15073-1-AP | 1:10,000                       | Proteintech Group, Inc.        | Western blotting   |
| $\beta$ -actin       | 66009-1-Ig | 1:5,000                        | Proteintech Group, Inc.        | Western blotting   |
| TBX15                | PA5-107289 | 1:200                          | Thermo Fisher Scientific, Inc. | IHC                |
| Ki67                 | AWA10320   | 1:400                          | Abiowell                       | IHC                |
| PD-L1                | ab205921   | 1:200                          | Abcam                          | IHC                |
| CD100                | ab231961   | 1:200                          | Abcam                          | IHC                |
| IFN- $\gamma$        | bs-0481R   | 1:200                          | BIOSS                          | IHC                |
| TNF- $\alpha$        | ab6671     | 1:200                          | Abcam                          | IHC                |
| m6A                  | 68055-1-Ig | 0.05 $\mu\text{g}/\mu\text{l}$ | Proteintech Group, Inc.        | MeRIP-qPCR         |
| CD86                 | MA1-10300  | 1-2 $\mu\text{g}/\text{ml}$    | Ebioscience                    | Flow cytometry     |
| CD206                | MA562234   | 4 $\mu\text{l}/10^6$           | Ebioscience                    | Flow cytometry     |
| Secondary antibodies |            |                                |                                |                    |
| HRP goat anti-mouse  | SA00001-1  | 1:5,000                        | Proteintech Group, Inc.        | Western blotting   |
| HRP goat anti-rabbit | SA00001-2  | 1:6,000                        | Proteintech Group, Inc.        | Western blotting   |

IHC, immunohistochemistry.

Table SII. Statistics of baseline information of the patients with GC.

| Characteristics              | GC            |
|------------------------------|---------------|
| N                            | 10            |
| Sex                          |               |
| Male                         | 7             |
| Female                       | 3             |
| Age, years                   |               |
| Median (P25, P75)            | 61.5 (52, 69) |
| Range                        | 43-76         |
| Tumor location               |               |
| Gastric body                 | 5             |
| Gastric angle                | 1             |
| Gastric antrum               | 3             |
| Gastric angle and antrum     | 1             |
| Tumor stage                  |               |
| I                            | 4             |
| II                           | 0             |
| III                          | 6             |
| T stage                      |               |
| T1                           | 1             |
| T2                           | 3             |
| T3                           | 3             |
| T4                           | 3             |
| N stage                      |               |
| N0                           | 3             |
| N1-N3                        | 7             |
| M stage                      |               |
| M0                           | 10            |
| M1                           | 0             |
| Site of metastatic nodes     |               |
| Lesser curvature             | 2             |
| Greater curvature            | 1             |
| Lesser and greater curvature | 4             |
| None                         | 3             |

GC, gastric cancer.

Table SIII. Primer sequences.

| Gene name         | Primer sequence                                          | Length (bp) | Species | Experiment |
|-------------------|----------------------------------------------------------|-------------|---------|------------|
| <i>β-actin</i>    | F: ACCCTGAAGTACCCCATCGAG<br>R: AGCACAGCCTGGATAGCAAC      | 224         | Homo    | qPCR       |
| <i>TBX15</i>      | F: CCTCCCTCTCCCTCACCC<br>R: CCGCTAAATTCCTCCCTTCCC        | 75          | Homo    | qPCR       |
| <i>MMP14</i>      | F: GGGTCTTCGTTGCTCAGTCA<br>R: AACATTGAGAGGCACAGGG        | 145         | Homo    | qPCR       |
| <i>iNOS</i>       | F: TCAGCTGTGCCTTCAACCC<br>R: CCGAGGCCAAACACAGCGTA        | 199         | Homo    | qPCR       |
| <i>IL-1β</i>      | F: CCCTCTGTCATTGCTCCC<br>R: TAAAGAGAGCACACCAGTCCA        | 185         | Homo    | qPCR       |
| <i>TNF-α</i>      | F: GAACCCCGAGTGACAAGCCT<br>R: TATCTCTCAGCTCCACGCCAT      | 120         | Homo    | qPCR       |
| <i>Arg-1</i>      | F: TGGACAGACTAGGAATTGGCA<br>R: CCAGTCCGTCAACATCAAAACT    | 102         | Homo    | qPCR       |
| <i>IL-10</i>      | F: ACCTGCCTAACATGCTTCGAGA<br>R: CTCAGCTTGGGGCATCACCT     | 191         | Homo    | qPCR       |
| <i>CD206</i>      | F: TATGCCAGACACGATCCGACCC<br>R: AGTATGTCTCCGCTTCATGCCAT  | 135         | Homo    | qPCR       |
| <i>METTL3</i>     | F: ATATTCACATGGAAGTCCCTA<br>R: ATTTTCATCTACCCGTTTCATACCC | 169         | Homo    | qPCR       |
| <i>β-actin</i>    | F: ACATCCGTAAAGACCTCTATGCC<br>R: TACTCCTGCTTGCTGATCCAC   | 223         | Mus     | qPCR       |
| <i>TBX15</i>      | F: CGGGCGGCTAAAATGAGTGA<br>R: GACAAGTCCAGCCCCTTCTC       | 140         | Mus     | qPCR       |
| <i>GZMB</i>       | F: GAAGCCAGGAGATGTGTGCT<br>R: GCACGTTTGGTCTTTGGGTC       | 183         | Mus     | qPCR       |
| <i>PFP</i>        | F: TCTTGGTGGGACTTCAGCTT<br>R: TGCTTGCATTCTGACCGAGT       | 148         | Mus     | qPCR       |
| <i>CD100</i>      | F: GCTCCAGACCCTGGTAACAC<br>R: ATAAGGGGTGGGGTTCCTGA       | 232         | Mus     | qPCR       |
| <i>IFN-γ</i>      | F: GCCACGGCACAGTCATTGA<br>R: TGCTGATGGCCTGATTGTCTT       | 201         | Mus     | qPCR       |
| <i>TNF-α</i>      | F: AGCACAGAAAGCATGATCCG<br>R: CACCCCGAAGTTCAGTAGACA      | 162         | Mus     | qPCR       |
| <i>MMP14-chip</i> | F: GAATCGCTTAAACTCGGGAGG<br>R: GCAGTTTTCCCAGTTTTGGC      | 199         | Homo    | ChIP-qPCR  |

F, forward; R, reverse; qPCR, quantitative PCR; TBX15, T-box transcription factor 15; MMP14, matrix metalloproteinase 14; iNOS, inducible nitric oxide synthase; METTL3, methyltransferase-like 3; PFP, perforin; GZMB, granzyme B; IFN, interferon.
